# Supplementary material
Source: MDPI journal article supplement (https://www.mdpi.com/2073-4344/9/2/123)

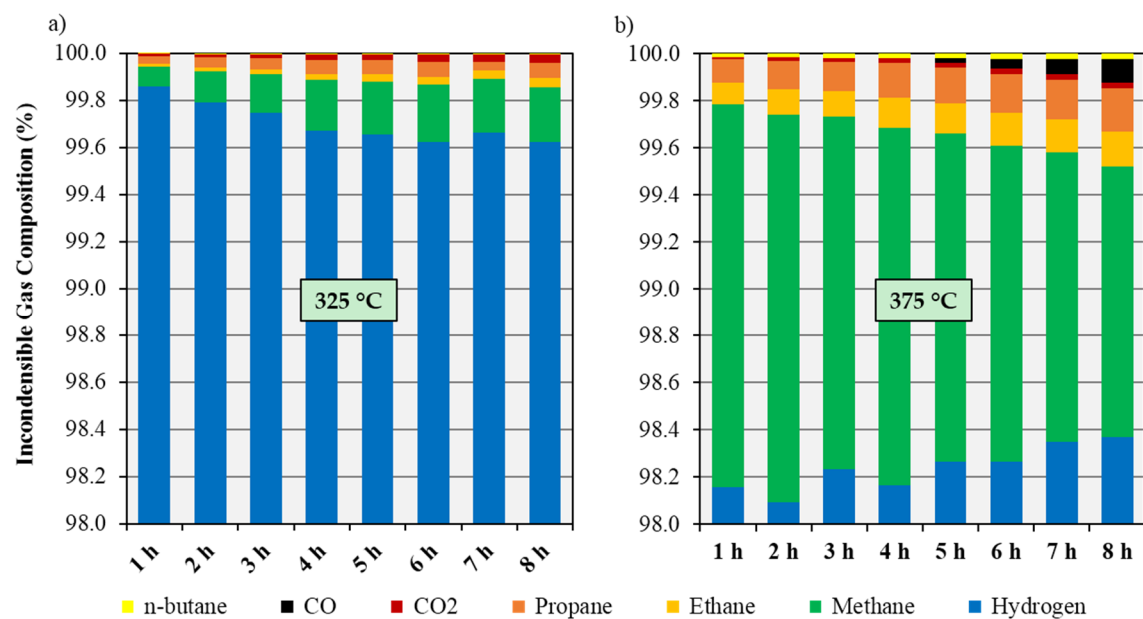

**Figure S1.** GC analysis of gas samples in the deoxygenation of BG lipids at (a) 325 °C and (b) 375 °C.

Supplement: s1 [file s1]
